# Supplementary material for: External electric field control: driving the reactivity of metal-free azide–alkyne click reactions
Source: Royal Society of Chemistry journal article supplement (doi:10.1039/c7cp04202g), 2017-01-01
Supplement: c7cp04202g1.pdf [file c7cp04202g1.pdf]

## Supporting Information

### **External Electric Field Control: Driving the Reactivity of Metal-Free Azide-Alkyne Click Reactions**

Kalishankar Bhattacharyya, Sharmistha Karmakar and Ayan Datta\*

Department of Spectroscopy, Indian Association for the Cultivation of Science, 2A and 2B Raja S. C. Mullick Road, Jadavpur – 700032, Kolkata, WestBengal, India

#### Contents

1. Computed activation barrier ( $\Delta E^\ddagger$ ,  $\Delta H^\ddagger$ ,  $\Delta G^\ddagger$ ) of **1-6** at various level of theory at gas phase geometries.
  2. Comparison of activation barrier of **1-6** at different DFT functional.
  3. Activation barrier of selected system at CCSD/aug-cc-PVDZ level of theory.
  4. Profile for variation of electronic energy barrier ( $\Delta E^\ddagger$ ) of **1**, **3**, **4-anti**, **5** and **6-anti** in presence of field.
  5. Solvent corrected electronic energy barrier of **1-6**.
  6. Cartesian coordinates, electronic energies, harmonic frequencies for all the transition state structures reported (**1-6**).
  7. References.
- 

1. **Table S1:** Activation barrier of **1-6** at various level of theory at gas phase geometries.

| Method<br>Molecule | B3LYP/6-31+G(d,p)   |                     |                     | B3LYP/6-311++G(d,p) |                     |                     | B3LYP-D3/6-311++G(d,P) |                     |                     |
|--------------------|---------------------|---------------------|---------------------|---------------------|---------------------|---------------------|------------------------|---------------------|---------------------|
|                    | $\Delta E^\ddagger$ | $\Delta H^\ddagger$ | $\Delta G^\ddagger$ | $\Delta E^\ddagger$ | $\Delta H^\ddagger$ | $\Delta G^\ddagger$ | $\Delta E^\ddagger$    | $\Delta H^\ddagger$ | $\Delta G^\ddagger$ |
| <b>1</b>           | 11.7                | 12.2                | 23.2<br>(24.9)      | 13.4                | 14.0                | 25.0                | 10.2                   | 10.8                | 21.8                |
| <b>2</b>           | 12.1                | 12.4                | 23.8<br>(24.8)      | 13.4                | 13.7                | 25.1                | 9.7                    | 10.0                | 21.4                |
| <b>3</b>           | 12.0                | 12.6                | 24.2                | 13.4                | 14.0                | 25.7                | 10.0                   | 10.6                | 22.2                |
| <b>4-syn</b>       | 9.9                 | 10.3                | 22.6<br>(22.9)      | 10.8                | 11.2                | 23.4                | 6.44                   | 6.9                 | 19.1                |
| <b>4-anti</b>      | 11.9                | 12.2                | 24.4<br>(24.2)      | 13.0                | 13.3                | 25.5                | 8.8                    | 9.1                 | 21.3                |
| <b>5</b>           | 12.0                | 12.8                | 24.5<br>(24.8)      | 13.3                | 13.7                | 26.2                | 8.3                    | 8.7                 | 21.2                |
| <b>6-syn</b>       | 10.2                | 10.7                | 21.8<br>(22.0)      | 11.1                | 11.5                | 24.0                | 6.6                    | 7.0                 | 19.5                |
| <b>6-anti</b>      | 12.5                | 12.8                | 25.1<br>(23.0)      | 13.6                | 13.9                | 26.1                | 9.2                    | 9.6                 | 21.8                |

**2. Table S2:** Activation barrier of **1-6** at various DFT functional at gas phase geometries.

| Method<br>Molecule | B3LYP/6-31+G(d,p)   |                     |                     | BP86/6-31+G(d,p)    |                     |                     | M06-2X/6-31+G(d,p)  |                     |                     |
|--------------------|---------------------|---------------------|---------------------|---------------------|---------------------|---------------------|---------------------|---------------------|---------------------|
|                    | $\Delta E^\ddagger$ | $\Delta H^\ddagger$ | $\Delta G^\ddagger$ | $\Delta E^\ddagger$ | $\Delta H^\ddagger$ | $\Delta G^\ddagger$ | $\Delta E^\ddagger$ | $\Delta H^\ddagger$ | $\Delta G^\ddagger$ |
| <b>1</b>           | 11.7                | 12.2                | 23.2                | 6.8                 | 7.3                 | 18.3                | 12.3                | 12.8                | 23.8                |
| <b>2</b>           | 12.1                | 12.4                | 23.8                | 7.1                 | 7.4                 | 18.8                | 12.1                | 12.4                | 23.7                |
| <b>3</b>           | 12.0                | 12.6                | 24.2                | 7.4                 | 8.1                 | 19.7                | 10.9                | 11.5                | 23.1                |
| <b>4-syn</b>       | 9.9                 | 10.3                | 22.6                | 4.9                 | 5.4                 | 17.5                | 8.1                 | 8.6                 | 20.7                |
| <b>4-anti</b>      | 11.9                | 12.2                | 24.4                | 7.3                 | 7.7                 | 19.9                | 10.0                | 10.4                | 22.6                |
| <b>5</b>           | 12.0                | 12.8                | 24.5                | 7.0                 | 7.3                 | 19.8                | 11.5                | 11.9                | 24.4                |
| <b>6-syn</b>       | 10.2                | 10.7                | 21.8                | 5.6                 | 6.0                 | 18.6                | 8.7                 | 9.1                 | 21.6                |
| <b>6-anti</b>      | 12.5                | 12.8                | 25.1                | 7.8                 | 8.2                 | 20.5                | 10.7                | 11.1                | 23.3                |

**3. Table S3:** Comparison of electronic energy barrier ( $\Delta E^\ddagger$ ) (in kcal/mol) of metal –free Azide-Alkyne click reactions with higher level of theory.

| Molecule      | $\Delta E^\ddagger$<br>(CCSD/aug-<br>cc-PVDZ) | $\Delta E^\ddagger$<br>(B3LYP/6-<br>31+G(d,p)) |
|---------------|-----------------------------------------------|------------------------------------------------|
| <b>1</b>      | 14.6                                          | 11.7                                           |
| <b>2</b>      | 13.1                                          | 12.1                                           |
| <b>3</b>      | 13.0                                          | 12.0                                           |
| <b>4-syn</b>  | 9.5                                           | 9.9                                            |
| <b>4-anti</b> | 11.3                                          | 11.9                                           |

4. Variation of electronic energy barrier ( $\Delta E^\ddagger$ ) with external electric field ( $F_x$ ) of **1-6**.

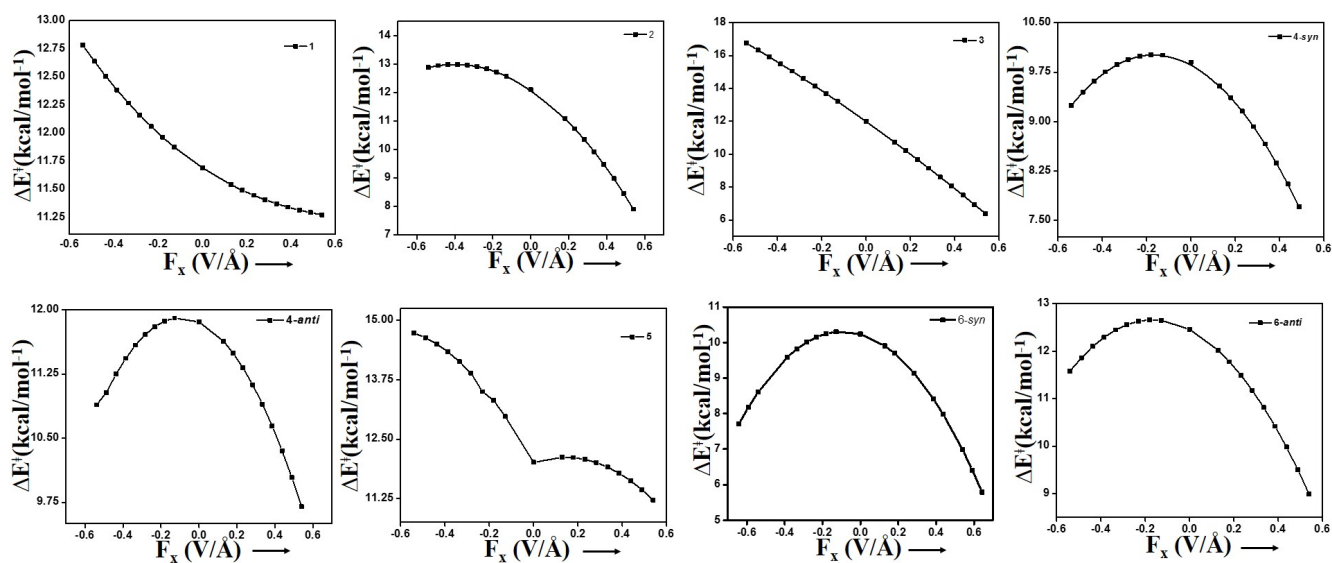

**Figure S1:** Effect of EEF on the electronic energy barrier ( $\Delta E^\ddagger$ ) of metal-free Azide –Alkyne click reaction of the **1, 2, 3, 4-syn, 4-anti, 5, 6-syn** and **6-anti**.

5. Solvent corrected electronic energy barrier ( $\Delta E^\ddagger$ ) of **1-6**.

**Table S2.** Electronic energy barrier ( $\Delta E^\ddagger$ ) (in kcal/mol) of metal –free Azide-Alkyne click reactions for **1-6** in presence/absence of EEF. Activation barrier at COSMO solvation model are shown in

parentheses.

| Molecule      | $\Delta E^\ddagger_{\text{gas}}$<br>(F=0) | $\Delta E^\ddagger_{\text{gas}}$<br>(F=0.5V/Å) | $\Delta E^\ddagger_{\text{solvn}}$<br>(F=0) | $\Delta E^\ddagger_{\text{solvn}}$<br>(F=0.5V/Å) |
|---------------|-------------------------------------------|------------------------------------------------|---------------------------------------------|--------------------------------------------------|
| <b>1</b>      | 11.7                                      | 11.3                                           | 8.2 (6.0)                                   | 5.0                                              |
| <b>2</b>      | 12.1                                      | 7.9                                            | 8.7 (7.1)                                   | 2.6                                              |
| <b>3</b>      | 12.0                                      | 9.7                                            | 5.3 (5.3)                                   | 0.8                                              |
| <b>4-syn</b>  | 9.9                                       | 7.3                                            | 5.4 (3.5)                                   | 2.7                                              |
| <b>4-anti</b> | 11.9                                      | 9.7                                            | 5.2 (3.4)                                   | 2.6                                              |
| <b>5</b>      | 12.0                                      | 11.2                                           | 8.0 (7.9)                                   | 6.2                                              |
| <b>6-syn</b>  | 10.2                                      | 7.0                                            | 4.8 (2.1)                                   | 1.7                                              |
| <b>6-anti</b> | 12.5                                      | 9.0                                            | 4.7 (2.1)                                   | 1.7                                              |

6. Cartesian Coordinates, electronic energies and harmonic frequencies for all the transition state structures of **1-6**.

1

| Atom | X           | Y           | Z           |
|------|-------------|-------------|-------------|
| C    | 2.50449200  | -0.68228300 | 0.26937800  |
| C    | 2.47265100  | 0.74872800  | -0.34671900 |
| C    | 1.60976700  | 1.82880000  | 0.34855300  |
| C    | 0.12843300  | 1.91864000  | -0.09586600 |
| C    | 1.62061200  | -1.78369000 | -0.36418600 |
| C    | 0.18445700  | -1.91797800 | 0.18600500  |
| H    | 2.29840300  | -0.62172400 | 1.34735900  |
| H    | 2.19860500  | 0.68610800  | -1.40918700 |
| H    | 1.64280900  | 1.67154300  | 1.43434600  |
| H    | 3.54020100  | -1.03444700 | 0.19025000  |
| H    | 3.50387300  | 1.12197200  | -0.33252400 |
| H    | 2.05933200  | 2.81340400  | 0.16515600  |
| H    | -0.39605900 | 2.65545800  | 0.52175000  |
| H    | 0.06914100  | 2.27820500  | -1.13196000 |
| H    | 2.11366500  | -2.75378600 | -0.21744700 |

|   |             |             |             |
|---|-------------|-------------|-------------|
| H | 1.57045500  | -1.62646900 | -1.44957100 |
| H | -0.35053200 | -2.70804200 | -0.35220400 |
| H | 0.21406400  | -2.23192200 | 1.23858900  |
| C | -0.54191900 | -0.63565200 | 0.09016600  |
| C | -0.49623100 | 0.59748200  | 0.00158900  |
| N | -2.59154900 | -1.20909200 | 0.08892100  |
| N | -3.12591300 | -0.17324000 | -0.02060500 |
| N | -2.81548900 | 1.04610300  | -0.11545800 |
| H | -3.62682300 | 1.65904100  | -0.20848600 |

Img. Frequencies (cm<sup>-1</sup>) = -351.9818

Electronic Energies = -476.8021105 hartree

## 2

| <b>Atom</b> | <b>X</b>    | <b>Y</b>    | <b>Z</b>    |
|-------------|-------------|-------------|-------------|
| C           | 2.95981100  | -0.23933300 | 0.23592600  |
| C           | 2.59293900  | 1.17445100  | -0.30956900 |
| C           | 1.50007100  | 1.99386500  | 0.42369200  |
| C           | 0.03949300  | 1.76596400  | -0.03181000 |
| C           | 2.34507700  | -1.47941000 | -0.45997400 |
| C           | 0.97964100  | -1.94931000 | 0.08291000  |
| H           | 2.73548200  | -0.28251800 | 1.31150000  |
| H           | 2.33369100  | 1.09510400  | -1.37490100 |
| H           | 1.56674200  | 1.79057300  | 1.50134000  |
| H           | 4.05607700  | -0.33928600 | 0.15367300  |
| H           | 3.51498200  | 1.77737000  | -0.27124800 |
| H           | 1.72471000  | 3.06262400  | 0.29476300  |
| H           | -0.62653800 | 2.36914300  | 0.59438100  |
| H           | -0.09210700 | 2.13683700  | -1.05823000 |

|   |             |             |             |
|---|-------------|-------------|-------------|
| H | 3.05223400  | -2.32093000 | -0.36828100 |
| H | 2.24621600  | -1.27310800 | -1.53475500 |
| H | 0.61839500  | -2.79843500 | -0.50965100 |
| H | 1.09899700  | -2.33289400 | 1.10711700  |
| C | -0.01133100 | -0.86304900 | 0.08433500  |
| C | -0.31153300 | 0.34020400  | 0.03282700  |
| N | -1.83394400 | -1.92644000 | 0.32959500  |
| N | -2.55740400 | -1.00579100 | 0.30587700  |
| N | -2.54028900 | 0.23897700  | 0.27578000  |
| C | -3.72498500 | 1.02231500  | -0.11735900 |
| H | -4.55689200 | 0.83855000  | 0.56791500  |
| H | -3.44437700 | 2.07371400  | -0.04287600 |
| H | -4.03740500 | 0.80009100  | -1.14199600 |

Img. Frequencies (cm<sup>-1</sup>) = -366.9100

Electronic Energies = -516.1130684 hartree

### 3

| <b>Atom</b> | <b>X</b>   | <b>Y</b>    | <b>Z</b>    |
|-------------|------------|-------------|-------------|
| C           | 2.52008600 | -0.38511600 | 0.12475700  |
| C           | 2.53910000 | 1.07794100  | -0.40131200 |
| C           | 1.72520500 | 2.13848700  | 0.37541300  |
| C           | 0.24867800 | 2.31856000  | -0.04812800 |
| C           | 1.56787700 | -1.39769100 | -0.54563600 |
| C           | 0.14594400 | -1.47815700 | 0.00685300  |
| H           | 2.35615800 | -0.39185800 | 1.20944300  |
| H           | 2.25410800 | 1.09583700  | -1.46262500 |
| H           | 1.76097100 | 1.90765300  | 1.44755600  |
| H           | 3.52858800 | -0.78912700 | -0.01907200 |
| H           | 3.58399500 | 1.40858400  | -0.37431800 |

|   |             |             |             |
|---|-------------|-------------|-------------|
| H | 2.20917000  | 3.11579300  | 0.25402000  |
| H | -0.23204100 | 3.05528300  | 0.60457800  |
| H | 0.19513600  | 2.72363000  | -1.06746400 |
| H | 1.97402200  | -2.40991200 | -0.43852000 |
| H | 1.48602000  | -1.19647900 | -1.61962000 |
| C | -0.57740900 | -0.19768600 | -0.01446000 |
| C | -0.46225100 | 1.03570800  | -0.01374500 |
| N | -2.72346500 | -0.64797100 | 0.00163200  |
| N | -3.08237700 | 0.45807700  | -0.01126700 |
| N | -2.63628400 | 1.63121500  | -0.15551200 |
| H | -3.23430100 | 2.33642300  | 0.27880500  |
| F | -0.52889100 | -2.45032000 | -0.70870700 |
| F | 0.19255600  | -1.95150900 | 1.31418600  |

Img. Frequencies (cm<sup>-1</sup>) = -382.6977

Electronic Energies = -675.2907583 hartree

#### 4-Syn

| Atom | X          | Y           | Z           |
|------|------------|-------------|-------------|
| C    | 3.06961000 | 0.30254800  | -0.39759200 |
| C    | 2.58732500 | -1.05293600 | 0.19622600  |
| C    | 1.39518400 | -1.76598100 | -0.47865200 |
| C    | 0.00312300 | -1.38397700 | 0.02122200  |
| C    | 2.61534900 | 1.60822600  | 0.29615300  |
| C    | 1.26792700 | 2.20122500  | -0.17364900 |
| H    | 2.82123700 | 0.34849000  | -1.46742000 |
| H    | 2.38775700 | -0.94375800 | 1.26934700  |
| H    | 1.40852200 | -1.59354600 | -1.56048400 |
| H    | 4.16505300 | 0.29261700  | -0.35298000 |
| H    | 3.42855100 | -1.75178600 | 0.12623400  |

|   |             |             |             |
|---|-------------|-------------|-------------|
| H | 1.47233900  | -2.84802300 | -0.32265900 |
| H | 3.37942200  | 2.37874700  | 0.13147100  |
| H | 2.57203900  | 1.44524600  | 1.38051100  |
| H | 1.02778500  | 3.09758500  | 0.40813500  |
| H | 1.34598000  | 2.52824700  | -1.21976500 |
| C | 0.18903700  | 1.20768300  | -0.07827100 |
| C | -0.25373000 | 0.05436400  | -0.03150100 |
| N | -1.67632200 | 2.44462700  | 0.03238500  |
| N | -2.41920400 | 1.54844700  | 0.11039600  |
| N | -2.47612600 | 0.30845700  | 0.26316400  |
| F | -0.93043700 | -2.09534300 | -0.72884300 |
| F | -0.15944700 | -1.84860200 | 1.32098000  |
| C | -3.62241300 | -0.44125500 | -0.25834200 |
| H | -3.41748500 | -1.49142900 | -0.05516200 |
| H | -4.54479500 | -0.15352300 | 0.25732100  |
| H | -3.74436300 | -0.30345100 | -1.33896400 |

Img. Frequencies (cm<sup>-1</sup>) = -339.8197

Electronic Energies = -714.6057276 hartree

#### **4-anti**

| <b>Atom</b> | <b>X</b>    | <b>Y</b>    | <b>Z</b>    |
|-------------|-------------|-------------|-------------|
| C           | 2.69095500  | 0.06955000  | 0.24512600  |
| C           | 2.41543000  | 1.47029400  | -0.37120600 |
| C           | 1.34613800  | 2.36366800  | 0.29948300  |
| C           | -0.10597500 | 2.19341400  | -0.20455900 |
| C           | 2.01730700  | -1.16464300 | -0.39046800 |
| C           | 0.61729600  | -1.51878900 | 0.10852400  |
| H           | 2.48073700  | 0.08556800  | 1.32170200  |



|   |             |             |             |
|---|-------------|-------------|-------------|
| H | 2.19361000  | 1.36872600  | -1.44293000 |
| H | 1.36621400  | 2.19986900  | 1.38430400  |
| H | 3.76925300  | -0.10817300 | 0.16199000  |
| H | 3.35901700  | 2.02615700  | -0.31982900 |
| H | 1.61462400  | 3.41604300  | 0.14178800  |
| H | -0.76910700 | 2.84619000  | 0.37474000  |
| H | -0.18225000 | 2.52264700  | -1.24971700 |
| H | 2.62572200  | -2.05511300 | -0.19541400 |
| H | 1.95372600  | -1.05112300 | -1.47849600 |
| C | -0.36135400 | -0.43368600 | -0.04116300 |
| C | -0.52751500 | 0.79045000  | -0.11923400 |
| N | -2.38503000 | -1.34954600 | -0.10802200 |
| N | -2.95305700 | -0.33857400 | -0.21132600 |
| N | -2.78170500 | 0.89230400  | -0.40773700 |
| F | 0.21254200  | -2.66433600 | -0.55342400 |
| F | 0.69327100  | -1.88009800 | 1.45092600  |
| C | -3.74746500 | 1.83265700  | 0.16579000  |
| H | -3.36739000 | 2.83380900  | -0.04400400 |
| H | -4.72918400 | 1.73640500  | -0.31099000 |
| H | -3.85589900 | 1.71009500  | 1.25045000  |

Img. Frequencies (cm<sup>-1</sup>) = -343.2092

Electronic Energies = -714.6025655 hartree

## 5

| <b>Atom</b> | <b>X</b>   | <b>Y</b>    | <b>Z</b>    |
|-------------|------------|-------------|-------------|
| C           | 4.58567000 | -0.11087800 | 0.60757800  |
| C           | 3.92620100 | -1.52193700 | 0.65621500  |
| C           | 3.14871200 | -2.01643200 | -0.58721600 |

|   |             |             |             |
|---|-------------|-------------|-------------|
| C | 1.64912600  | -1.63944100 | -0.65772500 |
| C | 3.85505700  | 1.07500100  | 1.28261500  |
| C | 2.85280600  | 1.85590300  | 0.40419300  |
| H | 4.81883500  | 0.14842400  | -0.43479400 |
| H | 3.28461700  | -1.59762300 | 1.54545900  |
| H | 3.64659600  | -1.64697500 | -1.49294500 |
| H | 5.55659800  | -0.20166600 | 1.10979200  |
| H | 4.73658100  | -2.24299100 | 0.81843200  |
| H | 3.20762400  | -3.11210700 | -0.62717800 |
| H | 1.23285000  | -1.98135100 | -1.61187100 |
| H | 1.09567900  | -2.16777300 | 0.13125000  |
| H | 4.60686600  | 1.79410900  | 1.63390400  |
| H | 3.33342600  | 0.71399800  | 2.17886400  |
| C | 1.84362400  | 0.95091200  | -0.17635000 |
| C | 1.48812800  | -0.19030700 | -0.49263100 |
| N | 0.21116700  | 2.28593200  | -0.74068900 |
| N | -0.55195200 | 1.49967600  | -1.14913400 |
| N | -0.63309100 | 0.26817300  | -1.39929500 |
| C | -1.94525300 | -0.34149400 | -1.62478500 |
| H | -1.71967200 | -1.38859200 | -1.85760800 |
| H | -2.41415500 | 0.08117000  | -2.52314800 |
| C | -2.91437200 | -0.27179900 | -0.45427000 |
| C | -4.29265000 | -0.21074100 | -0.69817900 |
| C | -2.46249000 | -0.30514500 | 0.87186700  |
| C | -5.20523700 | -0.19399500 | 0.35995500  |
| H | -4.65609000 | -0.17142700 | -1.72266800 |
| C | -3.37316000 | -0.28457500 | 1.93102300  |
| H | -1.39546000 | -0.33700100 | 1.07186100  |
| C | -4.74715700 | -0.23116400 | 1.67934800  |
| H | -6.27054900 | -0.14314700 | 0.15322500  |

|   |             |             |             |
|---|-------------|-------------|-------------|
| H | -3.00831700 | -0.30641400 | 2.95410500  |
| H | -5.45379100 | -0.21227500 | 2.50399000  |
| H | 2.37505600  | 2.64657100  | 0.99365100  |
| H | 3.38641500  | 2.36515700  | -0.41032400 |

Img. Frequencies (cm<sup>-1</sup>) = -313.1936

Electronic Energies = -747.1788235 hartree

### 6-Syn

| Atom | X          | Y           | Z           |
|------|------------|-------------|-------------|
| C    | 5.13334200 | -0.03343400 | 0.05853100  |
| C    | 4.73378200 | -1.50225800 | 0.38372300  |
| C    | 3.79174500 | -2.23832900 | -0.59426100 |
| C    | 2.29380600 | -2.08533200 | -0.33829900 |
| C    | 4.39254300 | 1.10677800  | 0.79543800  |
| C    | 3.08296700 | 1.60699000  | 0.14523300  |
| H    | 5.08036800 | 0.13386800  | -1.02662200 |
| H    | 4.32619000 | -1.56490100 | 1.40018000  |
| H    | 3.97817300 | -1.91305700 | -1.62369500 |
| H    | 6.19386900 | 0.06800100  | 0.31744400  |
| H    | 5.65834800 | -2.09014200 | 0.40380300  |
| H    | 3.98425200 | -3.31655000 | -0.55619300 |
| H    | 5.06374700 | 1.97192900  | 0.87005100  |
| H    | 4.18002900 | 0.79322400  | 1.82544200  |
| H    | 2.62697200 | 2.38390700  | 0.76801100  |
| H    | 3.30158000 | 2.07976000  | -0.82227900 |
| C    | 2.14523800 | 0.49839600  | -0.08350600 |
| C    | 1.85999900 | -0.69135900 | -0.26323500 |

|   |             |             |             |
|---|-------------|-------------|-------------|
| N | 0.14080300  | 1.48658700  | -0.14511800 |
| N | -0.48034400 | 0.51367800  | -0.31306800 |
| N | -0.38378000 | -0.73400900 | -0.34228900 |
| F | 1.61599600  | -2.77675500 | -1.33994500 |
| F | 1.96012400  | -2.75012800 | 0.83664500  |
| C | -1.36173100 | -1.53326500 | -1.10993100 |
| H | -0.90961000 | -2.52552000 | -1.15645700 |
| H | -1.44054400 | -1.15374700 | -2.13586400 |
| C | -2.72884300 | -1.59687900 | -0.45834200 |
| C | -3.82802900 | -0.95859200 | -1.04451100 |
| C | -2.90987800 | -2.29431400 | 0.74513700  |
| C | -5.08961500 | -1.01682800 | -0.44346700 |
| H | -3.69934700 | -0.41399900 | -1.97689400 |
| C | -4.16665800 | -2.35180200 | 1.34818200  |
| H | -2.06028800 | -2.78798200 | 1.20969600  |
| C | -5.26104100 | -1.71299000 | 0.75450800  |
| H | -5.93391000 | -0.51826600 | -0.91100100 |
| H | -4.29409300 | -2.89691400 | 2.27911600  |
| H | -6.23975300 | -1.75980700 | 1.22322200  |

Img. Frequencies (cm<sup>-1</sup>) = -323.1060

Electronic Energies = -945.6716279 hartee

### **6-Anti**

| <b>Atom</b> | <b>X</b>   | <b>Y</b>    | <b>Z</b>    |
|-------------|------------|-------------|-------------|
| C           | 4.72207500 | -0.65682300 | -0.60640600 |
| C           | 4.64430700 | 0.88029600  | -0.82621200 |
| C           | 3.94902700 | 1.73679800  | 0.25744500  |
| C           | 2.42715300 | 1.95239600  | 0.08786100  |

|   |             |             |             |
|---|-------------|-------------|-------------|
| C | 3.68059300  | -1.55824600 | -1.30151500 |
| C | 2.36052900  | -1.78262900 | -0.56545100 |
| H | 4.73996600  | -0.88212500 | 0.46712600  |
| H | 4.19878800  | 1.09353800  | -1.80815900 |
| H | 4.13671800  | 1.29587400  | 1.24451500  |
| H | 5.69570800  | -0.98427800 | -0.98864600 |
| H | 5.67781700  | 1.24051200  | -0.89015400 |
| H | 4.41011500  | 2.73258000  | 0.27198700  |
| H | 2.04772200  | 2.53655000  | 0.93426800  |
| H | 2.23127300  | 2.54853400  | -0.81372400 |
| H | 4.10240800  | -2.55952300 | -1.44551900 |
| H | 3.43478000  | -1.16745800 | -2.29531100 |
| C | 1.63068200  | -0.54585300 | -0.25527400 |
| C | 1.72685800  | 0.66840500  | -0.03221600 |
| N | -0.51852000 | -1.05043800 | -0.06152200 |
| N | -0.86219000 | 0.03502800  | 0.17973600  |
| N | -0.45554000 | 1.22661900  | 0.21539700  |
| F | 1.59623500  | -2.64704500 | -1.32863300 |
| F | 2.61426500  | -2.46899000 | 0.61929800  |
| C | -1.08698300 | 2.15717400  | 1.17203300  |
| H | -0.42983700 | 3.03173900  | 1.16679800  |
| H | -1.07332200 | 1.73695000  | 2.18569300  |
| C | -2.49713900 | 2.56532900  | 0.79110000  |
| C | -3.58679100 | 2.16441800  | 1.57261300  |
| C | -2.73048700 | 3.34354200  | -0.35210000 |
| C | -4.88912600 | 2.53543900  | 1.22260600  |
| H | -3.41862000 | 1.55833000  | 2.45952800  |
| C | -4.02857500 | 3.71324900  | -0.70488800 |
| H | -1.89151900 | 3.65276700  | -0.97023800 |
| C | -5.11247800 | 3.31014200  | 0.08303700  |

|   |             |            |             |
|---|-------------|------------|-------------|
| H | -5.72481000 | 2.21682300 | 1.83892500  |
| H | -4.19588500 | 4.31654100 | -1.59258200 |
| H | -6.12287200 | 3.59895200 | -0.19128600 |

Imag. Frequencies ( $\text{cm}^{-1}$ ) = -329.4842

Electronic Energies = -945.6681091 hartree

## 7. References :

Complete reference for G09.

Frisch, M. J.; Trucks, G. W.; Schlegel, H. B.; Scuseria, G. E.; Robb, M. A.; Cheeseman, J. R.; Scalmani, G.; Barone, V.; Mennucci, B.; Petersson, G. A.; Nakatsuji, H.; Caricato, M.; Li, X.; Hratchian, H. P.; Izmaylov, A. F.; Bloino, J.; Zheng, G.; Sonnenberg, J. L.; Hada, M.; Ehara, M.; Toyota, K.; Fukuda, R.; Hasegawa, J.; Ishida, M.; Nakajima, T.; Honda, Y.; Kitao, O.; Nakai, H.; Vreven, T.; Montgomery, Jr., J. A.; Peralta, J. E.; Ogliaro, F.; Bearpark, M.; Heyd, J. J.; Brothers, E.; Kudin, K. N.; Staroverov, V. N.; Kobayashi, R.; Normand, J.; Raghavachari, K.; Rendell, A.; Burant, J. C.; Iyengar, S. S.; Tomasi, J.; Cossi, M.; Rega, N.; Millam, J. M.; Klene, M.; Knox, J. E.; Cross, J. B.; Bakken, V.; Adamo, C.; Jaramillo, J.; Gomperts, R.; Stratmann, R. E.; Yazyev, O.; Austin, A. J.; Cammi, R.; Pomelli, C.; Ochterski, J. W.; Martin, R. L.; Morokuma, K.; Zakrzewski, V. G.; Voth, G. A.; Salvador, P.; Dannenberg, J. J.; Dapprich, S.; Daniels, A. D.; Farkas, Ö.; Foresman, J. B.; Ortiz, J. V.; Cioslowski, J.; Fox, D. J. Gaussian 09, revision D.01; Gaussian, Inc.: Wallingford, CT, 2009.
